# Supplementary material
Source: PubMed Central journal article supplement (PMC5933403)
Supplement: EHP1612.s001.acco.pdf [file EHP1612.s001.acco.pdf]

**Note to readers with disabilities:** *EHP* strives to ensure that all journal content is accessible to all readers. However, some figures and Supplemental Material published in *EHP* articles may not conform to [508 standards](#) due to the complexity of the information being presented. If you need assistance accessing journal content, please contact [ehp508@niehs.nih.gov](mailto:ehp508@niehs.nih.gov). Our staff will work with you to assess and meet your accessibility needs within 3 working days.

### **Supplemental Material**

#### **Plasma Concentrations of Per- and Polyfluoroalkyl Substances at Baseline and Associations with Glycemic Indicators and Diabetes Incidence among High-Risk Adults in the Diabetes Prevention Program Trial**

Andres Cardenas, Diane R. Gold, Russ Hauser, Ken P. Kleinman, Marie-France Hivert, Antonia M. Calafat, Xiaoyun Ye, Thomas F. Webster, Edward S. Horton, and Emily Oken

#### **Table of Contents**

**Figure S1.** PFAS geometric means in the Diabetes Prevention Program (red) and six NHANES cycles (blue colors)

**Table S1.** PFAS geometric means and 95% CIs (ng/mL) in NHANES and in the Diabetes Prevention Program (DPP)

**Table S2.** Adjusted cross-sectional associations between baseline PFAS plasma concentrations and glycemic outcomes in the Diabetes Prevention Program among isomers of PFOS (n-PFOS, Sm-PFOS, Sm2-PFOS) and PFOA (n-PFOA and Sb-PFOA) and PFOA (n-PFOA, Sb-PFOA)

**Table S3.** Adjusted longitudinal associations of baseline plasma PFAS concentrations and prospective metabolic and glycemic measurements in the DPP.

**Table S4.** Adjusted Hazards Ratios (HRs) for time to first fasting hyperglycemia during study period relative to  $\log_2$ -PFAS plasma concentrations in the Diabetes Prevention Program trial

**Table S5.** Adjusted Hazards Ratios (HRs) for the risk of developing diabetes during study period relative to  $\log_2$ -PFAS plasma concentrations stratified by treatment assignment

**Table S6.** Adjusted Hazards Ratios (HRs) for the risk of developing diabetes during study period relative to  $\log_2$ -PFAS plasma concentrations stratified by sex

**Table S7.** Adjusted Hazards Ratios (HRs) for the risk of developing diabetes during study period: multiplicative interaction between baseline  $\log_2$ -PFAS plasma concentrations and BMI at baseline.

**Appendix A.** Longitudinal Regression Model Equations

**Figure S1.** PFAS geometric means in the Diabetes Prevention Program (red) and six NHANES cycles (blue colors)

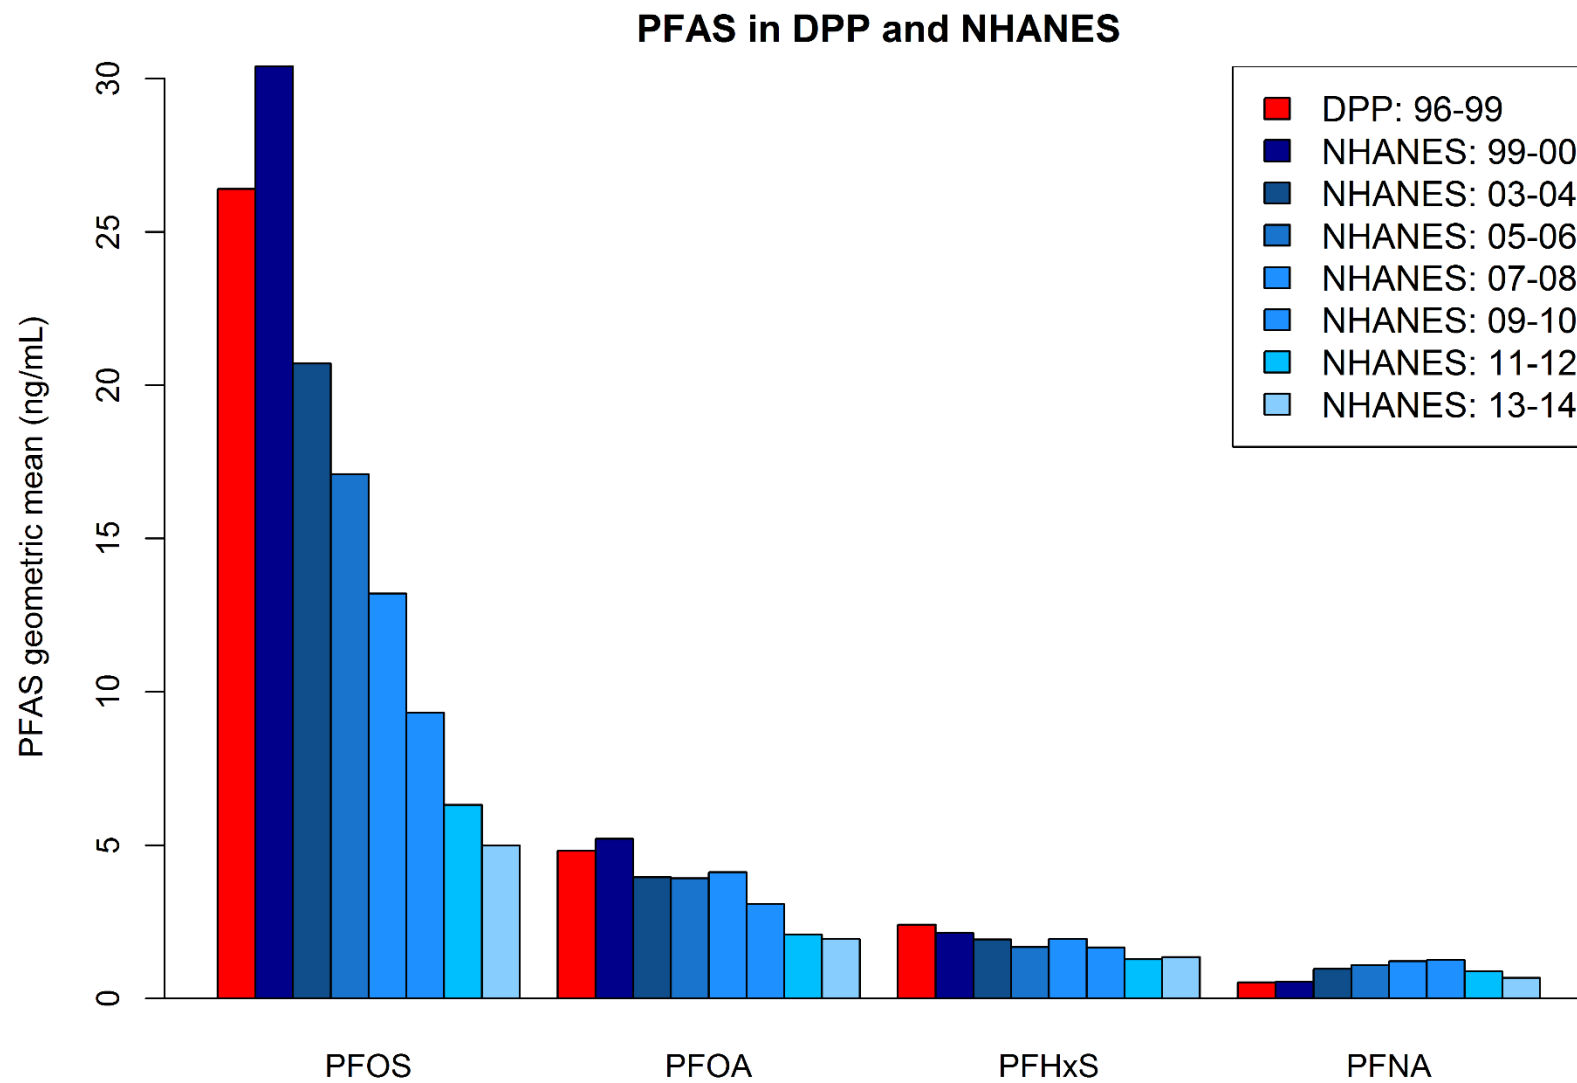

**Table S1.** PFAS geometric means and 95% CIs (ng/mL) in NHANES and in the Diabetes Prevention Program (DPP)

| <b>NHANES/DPP<br/>Survey year</b> | <b>PFOS</b>             | <b>PFOA</b>             | <b>PFHxS</b>            | <b>PFNA</b>             | <b>Et-PFOSA-AcOH</b>    | <b>Me-PFOSA-AcOH</b>    |
|-----------------------------------|-------------------------|-------------------------|-------------------------|-------------------------|-------------------------|-------------------------|
| <b>DPP (1996-1999)</b>            | <b>26.4 (25.3-27.5)</b> | <b>4.82 (4.65-5.00)</b> | <b>2.41 (2.29-2.54)</b> | <b>0.53 (0.50-0.56)</b> | <b>1.13 (1.06-1.21)</b> | <b>0.94 (0.89-1.00)</b> |
| 1999-2000                         | 30.4 (27.1-33.9)        | 5.21 (4.72-5.74)        | 2.13 (1.91-2.38)        | 0.55 (0.46-0.67)        | 0.64 (0.59-0.69)        | 0.84 (0.73-0.97)        |
| 2003-2004                         | 20.7 (19.2-22.3)        | 3.95 (3.65-4.27)        | 1.93 (1.73-2.16)        | 0.97 (0.82-1.14)        | <LOD                    | <LOD                    |
| 2005-2006                         | 17.1 (16.0-18.2)        | 3.92 (3.48-4.42)        | 1.67 (1.42-1.98)        | 1.09 (0.91-1.29)        | <LOD                    | 0.41 (0.37-0.45)        |
| 2007-2008                         | 13.2 (12.2-14.2)        | 4.12 (4.01-4.24)        | 1.95 (1.76-2.17)        | 1.22 (1.12-1.32)        | <LOD                    | 0.30 (0.27-0.33)        |
| 2009-2010                         | 9.32 (8.13-10.7)        | 3.07 (2.81-3.36)        | 1.66 (1.51-1.82)        | 1.26 (1.11-1.44)        | <LOD                    | 0.19 (0.18-0.21)        |
| 2011-2012                         | 6.31 (5.84-6.82)        | 2.08 (1.95-2.22)        | 1.28 (1.15-1.43)        | 0.88 (0.80-0.97)        | <LOD                    | <LOD                    |
| 2013-2014                         | 4.99 (4.50-5.52)        | 1.94 (1.76-2.14)        | 1.35 (1.20-1.52)        | 0.67 (0.61-0.74)        | ---                     | <LOD                    |

**Table S2.** <sup>a</sup>Adjusted cross-sectional associations between baseline PFAS plasma concentrations and glycemic outcomes in the Diabetes Prevention Program among isomers of PFOS (n-PFOS, Sm-PFOS, Sm2-PFOS) and PFOA (n-PFOA and Sb-PFOA) and PFOA (n-PFOA, Sb-PFOA)

| Outcome                         | n   | Mean (SD)   | $\beta$ Coefficient (95% CI)                                   |                                                                  |                                          |                                                                 |                                                                 |
|---------------------------------|-----|-------------|----------------------------------------------------------------|------------------------------------------------------------------|------------------------------------------|-----------------------------------------------------------------|-----------------------------------------------------------------|
|                                 |     |             | Per doubling in PFASs concentration (ng/ml)                    |                                                                  |                                          |                                                                 |                                                                 |
|                                 |     |             | n-PFOS                                                         | Sm-PFOS                                                          | Sm2-PFOS                                 | n-PFOA                                                          | Sb-PFOA                                                         |
| HOMA-IR                         | 956 | 6.91 (3.9)  | <b>0.31</b><br>(0.05, 0.56)<br><i>P</i> =0.02                  | <b>0.48</b><br>(0.23, 0.73)<br><i>P</i> =1.79x10 <sup>-4</sup>   | 0.14<br>(-0.06, 0.34)<br><i>P</i> =0.17  | <b>0.64</b><br>(0.33, 0.96)<br><i>P</i> =6.10x10 <sup>-5</sup>  | <b>0.34</b><br>(0.18, 0.51)<br><i>P</i> =4.87x10 <sup>-5</sup>  |
| Fast. Insulin<br>( $\mu$ U/mL)  | 956 | 26 (14.6)   | <b>1.06</b><br>(0.13, 1.99)<br><i>P</i> =0.03                  | <b>1.73</b><br>(0.82, 2.64)<br><i>P</i> =2.02x10 <sup>-4</sup>   | 0.50<br>(-0.23, 1.23)<br><i>P</i> =0.18  | <b>2.29</b><br>(1.15, 3.43)<br><i>P</i> =9.13x10 <sup>-5</sup>  | <b>1.16</b><br>(0.56, 1.76)<br><i>P</i> =1.63x10 <sup>-4</sup>  |
| 30-min insulin<br>( $\mu$ U/mL) | 945 | 96.5 (53.6) | 2.98<br>(-0.60, 6.56)<br><i>P</i> =0.10                        | <b>6.53</b><br>(3.00, 10.06)<br><i>P</i> =3.02x10 <sup>-4</sup>  | 2.13<br>(-0.70, 1.23)<br><i>P</i> =0.14  | <b>8.11</b><br>(3.70, 12.51)<br><i>P</i> =3.19x10 <sup>-4</sup> | <b>3.41</b><br>(1.09, 5.74)<br><i>P</i> =4.06x10 <sup>-3</sup>  |
| Fast. proinsulin<br>(pM)        | 954 | 17.9 (13)   | <b>1.22</b><br>(0.38, 2.06)<br><i>P</i> =4.42x10 <sup>-3</sup> | <b>1.24</b><br>(0.42, 2.06)<br><i>P</i> =3.22x10 <sup>-3</sup>   | 0.53<br>(-0.13, 1.19)<br><i>P</i> =0.11  | <b>1.78</b><br>(0.75, 2.82)<br><i>P</i> =7.65x10 <sup>-4</sup>  | <b>0.76</b><br>(0.21, 1.30)<br><i>P</i> =6.33x10 <sup>-3</sup>  |
| HOMA- $\beta$                   | 956 | 217 (120)   | 6.83<br>(-0.92, 14.58)<br><i>P</i> =0.08                       | <b>13.06</b><br>(5.47, 20.65)<br><i>P</i> =7.62x10 <sup>-4</sup> | 3.93<br>(-2.16, 10.02)<br><i>P</i> =0.21 | <b>16.6</b><br>(7.05, 26.15)<br><i>P</i> =6.73x10 <sup>-4</sup> | <b>7.25</b><br>(2.24, 12.27)<br><i>P</i> =4.64x10 <sup>-3</sup> |
| Corrected<br>insulin response   | 945 | 0.60 (0.39) | 0.02<br>(-0.01, 0.04)<br><i>P</i> =0.23                        | <b>0.04</b><br>(0.01, 0.07)<br><i>P</i> =2.56x10 <sup>-3</sup>   | 0.01<br>(-0.01, 0.03)<br><i>P</i> =0.21  | <b>0.04</b><br>(0.01, 0.07)<br><i>P</i> =0.01                   | 0.02<br>(-0.001, 0.03)<br><i>P</i> =0.07                        |
| Insulinogenic<br>index          | 945 | 1.03 (0.84) | 0.03<br>(-0.03, 0.09)<br><i>P</i> =0.28                        | <b>0.08</b><br>(0.03, 0.14)<br><i>P</i> =3.84x10 <sup>-3</sup>   | 0.04<br>(-0.01, 0.08)<br><i>P</i> =0.11  | <b>0.08</b><br>(0.01, 0.15)<br><i>P</i> =0.02                   | 0.03<br>(-0.01, 0.07)<br><i>P</i> =0.09                         |
| Fast. Glucose<br>(mg/dL)        | 957 | 106.9 (7.4) | <b>0.55</b><br>(0.05, 1.04)<br><i>P</i> =0.03                  | 0.47<br>(-0.01, 0.96)<br><i>P</i> =0.06                          | 0.26<br>(0.12, 0.65)<br><i>P</i> =0.18   | 0.259<br>(-0.02, 1.20)<br><i>P</i> =0.06                        | <b>0.50</b><br>(0.18, 0.82)<br><i>P</i> =2.27x10 <sup>-3</sup>  |

|                        |     |              |                                                      |                                          |                                          |                                                       |                                                                          |
|------------------------|-----|--------------|------------------------------------------------------|------------------------------------------|------------------------------------------|-------------------------------------------------------|--------------------------------------------------------------------------|
| 30-min glucose (mg/dL) | 947 | 170.2 (24.3) | 0.69<br>(-0.94, 2.23)<br><i>P</i> =0.41              | 0.51<br>(-1.10, 2.13)<br><i>P</i> =0.53  | 0.44<br>(-0.85, 1.73)<br><i>P</i> =0.50  | 1.55<br>(-0.47, 3.57)<br><i>P</i> =0.13               | 1.04<br>(-0.02, 2.11)<br><i>P</i> =0.05                                  |
| 2-hour glucose (mg/dL) | 940 | 164.6 (17)   | 0.03<br>(-1.13, 1.19)<br><i>P</i> =0.96              | 0.03<br>(-1.13, 1.19)<br><i>P</i> =0.96  | -0.17<br>(-1.08, 0.74)<br><i>P</i> =0.71 | -0.53<br>(-1.97, 0.90)<br><i>P</i> =0.47              | -0.02<br>(-0.77, 0.74)<br><i>P</i> =0.96                                 |
| HbA1C (%)              | 954 | 5.9 (0.5)    | <b>0.55</b><br><b>(0.05, 1.04)</b><br><i>P</i> =0.03 | 0.02<br>(-0.01, 0.06)<br><i>P</i> =0.12  | 0.02<br>(-0.01, 0.04)<br><i>P</i> =0.19  | <b>0.05</b><br><b>(0.001, 0.08)</b><br><i>P</i> =0.04 | 0.01<br>(-0.01, 0.03)<br><i>P</i> =0.26                                  |
| Adiponectin (μg/mL)    | 956 | 8.1 (3.5)    | -0.09<br>(-0.30, 0.12)<br><i>P</i> =0.42             | -0.15<br>(-0.35, 0.06)<br><i>P</i> =0.17 | -0.15<br>(-0.35, 0.06)<br><i>P</i> =0.17 | -0.25<br>(-0.51, 0.01)<br><i>P</i> =0.06              | <b>-0.26</b><br><b>(-0.40, -0.13)</b><br><i>P</i> =1.56x10 <sup>-4</sup> |
| †BMI                   | 957 | 32.6 (6.6)   | 0.21<br>(-0.21, 0.63)<br><i>P</i> =0.33              | 0.32<br>(-0.09, 0.74)<br><i>P</i> =0.13  | -0.21<br>(-0.54, 0.13)<br><i>P</i> =0.22 | 0.15<br>(-0.37, 0.67)<br><i>P</i> =0.58               | 0.09<br>(-0.18, 0.37)<br><i>P</i> =0.52                                  |

<sup>a</sup>Adjusted for participant sex, race/ethnicity, BMI (continuous), age (categorical), marital status (categorical), education (categorical), and smoking history (categorical)

†Not adjusted for BMI

**Table S3.** Adjusted longitudinal associations of baseline plasma PFAS concentrations and prospective metabolic and glyceic measurements in the DPP.

| PFAS Analyte                | HOMA-IR                                                  |                                                        |                                                               |
|-----------------------------|----------------------------------------------------------|--------------------------------------------------------|---------------------------------------------------------------|
|                             | Model 1                                                  | Model 2                                                | Model 3                                                       |
| <b>log<sub>2</sub>-PFAS</b> | <b><math>\beta</math>(PFAS * time)<br/>Est. (95% CI)</b> | <b><math>\beta</math>(PFAS * Tx)<br/>Est. (95% CI)</b> | <b><math>\beta</math>(PFAS * time * Tx)<br/>Est. (95% CI)</b> |
| PFOS                        | -0.04 (-0.15, 0.07)<br>P=0.50                            | 0.17 (-0.26, 0.61)<br>P=0.44                           | 0.02 (-0.20, 0.25)<br>P=0.86                                  |
| PFOA                        | 0.02 (-0.11, 0.14)<br>P=0.82                             | 0.08 (-0.41, 0.57)<br>P=0.76                           | -0.01 (-0.27, 0.24)<br>P=0.94                                 |
| PFHxS                       | 0.01 (-0.06, 0.10)<br>P=0.67                             | -0.06 (-0.53, 0.11)<br>P=0.74                          | -0.09 (-0.26, 0.08)<br>P=0.30                                 |
| Et-PFOSA-AcOH               | -0.02 (-0.09, 0.05)<br>P=0.56                            | -0.01 (-0.53, 0.11)<br>P=0.92                          | 0.03 (-0.11, 0.18)<br>P=0.65                                  |
| Me-PFOSA-AcOH               | 0.04 (-0.03, 0.13)<br>P=0.24                             | -0.21 (-0.53, 0.11)<br>P=0.21                          | -0.002 (-0.17, 0.16)<br>P=0.97                                |
| PFNA                        | 0.06 (-0.03, 0.14)<br>P=0.18                             | 0.01 (-0.33, 0.35)<br>P=0.96                           | -0.06 (-0.23, 0.11)<br>P=0.48                                 |
|                             | HOMA- $\beta$                                            |                                                        |                                                               |
| PFOS                        | -1.12 (-4.01, 1.76)<br>P=0.45                            | 8.65 (-3.46, 20.76)<br>P=0.16                          | 0.67 (-5.11, 6.44)<br>P=0.82                                  |
| PFOA                        | -1.50 (-4.76, 1.76)<br>P=0.37                            | 0.06 (-13.65, 13.77)<br>P=0.99                         | -0.12 (-6.64, 6.40)<br>P=0.97                                 |
| PFHxS                       | 0.55 (-1.58, 2.68)<br>P=0.61                             | -5.02 (-14.42, 4.38)<br>P=0.29                         | -0.38 (-4.68, 3.91)<br>P=0.86                                 |
| Et-PFOSA-AcOH               | <b>-1.96 (-3.81, -0.11)</b><br><b>P=0.04</b>             | 1.34 (-6.33, 9.01)<br>P=0.73                           | 0.46 (-3.24, 4.16)<br>P=0.81                                  |
| Me-PFOSA-AcOH               | -0.51 (-2.63, 1.61)<br>P=0.64                            | -0.81 (-9.81, 8.19)<br>P=0.86                          | 0.73 (-3.51, 4.96)<br>P=0.74                                  |
| PFNA                        | 1.26 (-0.91, 3.42)<br>P=0.25                             | 0.36 (-9.03, 9.75)<br>P=0.94                           | -2.65 (-6.99, 1.68)<br>P=0.23                                 |
|                             | Fast. Insulin ( $\mu$ U/mL)                              |                                                        |                                                               |
| PFOS                        | -0.14 (-0.50, 0.22)<br>P=0.43                            | 0.78 (-0.69, 2.25)<br>P=0.30                           | -0.06 (-0.87, 0.75)<br>P=0.89                                 |
| PFOA                        | -0.01 (-0.42, 0.40)<br>P=0.96                            | 0.13 (-1.53, 1.78)<br>P=0.88                           | 0.11 (-0.61, 0.82)<br>P=0.77                                  |
| PFHxS                       | 0.06 (-0.20, 0.33)<br>P=0.63                             | -0.45 (-1.59, 0.69)<br>P=0.44                          | -0.22 (-0.76, 0.31)<br>P=0.42                                 |
| Et-PFOSA-AcOH               | -0.13 (-0.37, 0.10)<br>P=0.25                            | 0.05 (-0.87, 0.98)<br>P=0.91                           | 0.12 (-0.34, 0.58)<br>P=0.60                                  |
| Me-PFOSA-AcOH               | 0.10 (-0.16, 0.36)<br>P=0.47                             | -0.61 (-1.69, 0.48)<br>P=0.27                          | 0.01 (-0.52, 0.54)<br>P=0.97                                  |
| PFNA                        | 0.19 (-0.08, 0.46)<br>P=0.16                             | 0.001 (-1.13, 1.14)<br>P=0.99                          | -0.26 (-0.80, 0.28)<br>P=0.34                                 |

Table S3 continued.

| PFAS Analyte                | Fasting Glucose (mg/dL)                                        |                                                              |                                                                             |
|-----------------------------|----------------------------------------------------------------|--------------------------------------------------------------|-----------------------------------------------------------------------------|
|                             | Model 1                                                        | Model 2                                                      | Model 3                                                                     |
| <b>log<sub>2</sub>-PFAS</b> | <b><math>\beta(PFAS * time)</math></b><br><b>Est. (95% CI)</b> | <b><math>\beta(PFAS * Tx)</math></b><br><b>Est. (95% CI)</b> | <b><math>\beta(PFAS * time * Tx)^\dagger</math></b><br><b>Est. (95% CI)</b> |
| PFOS                        | -0.10 (-0.35, 0.19)<br><i>P</i> =0.56                          | -0.79 (-1.90, 0.33)<br><i>P</i> =0.16                        | 0.09 (-0.53, 0.71)<br><i>P</i> =0.79                                        |
| PFOA                        | 0.14 (-0.17, 0.45)<br><i>P</i> =0.38                           | -0.15 (-1.41, 1.11)<br><i>P</i> =0.82                        | -0.19 (-0.73, 0.35)<br><i>P</i> =0.49                                       |
| PFHxS                       | -0.02 (-0.23, 0.19)<br><i>P</i> =0.86                          | 0.26 (-0.37, 1.36)<br><i>P</i> =0.26                         | <b>-0.42 (-0.84, -0.01)</b><br><b><i>P</i>=0.04</b>                         |
| Et-PFOSA-AcOH               | 0.09 (-0.07, 0.27)<br><i>P</i> =0.28                           | -0.49 (-1.19, 0.22)<br><i>P</i> =0.17                        | 0.03 (-0.32, 0.37)<br><i>P</i> =0.88                                        |
| Me-PFOSA-AcOH               | 0.17 (-0.03, 0.37)<br><i>P</i> =0.09                           | -0.76 (-1.59, 0.206)<br><i>P</i> =0.07                       | -0.03 (-0.43, 0.38)<br><i>P</i> =0.89                                       |
| PFNA                        | 0.09 (-0.12, 0.30)<br><i>P</i> =0.40                           | -0.49 (-1.36, 0.27)<br><i>P</i> =0.27                        | -0.05 (-0.46, 0.37)<br><i>P</i> =0.83                                       |
|                             | HbA1c (%)                                                      |                                                              |                                                                             |
| PFOS                        | -0.004 (-0.01, 0.005)<br><i>P</i> =0.32                        | 0.003 (-0.04, 0.05)<br><i>P</i> =0.79                        | -0.009 (-0.03, 0.01)<br><i>P</i> =0.37                                      |
| PFOA                        | -0.007 (-0.02, 0.004)<br><i>P</i> =0.24                        | -0.033 (-0.10, 0.04)<br><i>P</i> =0.35                       | 0.0002 (-0.02, 0.02)<br><i>P</i> =0.98                                      |
| PFHxS                       | -0.006 (-0.01, 0.001)<br><i>P</i> =0.13                        | 0.013 (-0.03, 0.06)<br><i>P</i> =0.58                        | -0.006 (-0.02, 0.005)<br><i>P</i> =0.44                                     |
| Et-PFOSA-AcOH               | 0.001 (-0.01, 0.01)<br><i>P</i> =0.78                          | -0.007 (-0.05, 0.03)<br><i>P</i> =0.70                       | -0.004 (-0.01, 0.001)<br><i>P</i> =0.45                                     |
| Me-PFOSA-AcOH               | 0.007 (-0.001, 0.01)<br><i>P</i> =0.06                         | 0.016 (-0.03, 0.06)<br><i>P</i> =0.50                        | -0.007 (-0.02, 0.007)<br><i>P</i> =0.32                                     |
| PFNA                        | 0.001 (-0.006, 0.01)<br><i>P</i> =0.88                         | 0.006 (-0.04, 0.05)<br><i>P</i> =0.79                        | -0.009 (-0.02, 0.006)<br><i>P</i> =0.23                                     |
|                             | Fasting Pro-insulin (pM)                                       |                                                              |                                                                             |
| PFOS                        | -0.08 (-0.43, 0.26)<br><i>P</i> =0.63                          | 1.16 (-0.32, 2.63)<br><i>P</i> =0.12                         | 0.07 (-0.62, 0.75)<br><i>P</i> =0.85                                        |
| PFOA                        | -0.01 (-0.40, 0.38)<br><i>P</i> =0.96                          | 0.35 (-1.33, 2.02)<br><i>P</i> =0.68                         | -0.09 (-0.86, 0.69)<br><i>P</i> =0.82                                       |
| PFHxS                       | -0.09 (-0.35, 0.15)<br><i>P</i> =0.44                          | 0.34 (-0.82, 1.49)<br><i>P</i> =0.57                         | -0.26 (-0.77, 0.25)<br><i>P</i> =0.32                                       |
| Et-PFOSA-AcOH               | 0.03 (-0.19, 0.25)<br><i>P</i> =0.91                           | 0.35 (-0.59, 1.28)<br><i>P</i> =0.47                         | -0.26 (-0.77, 0.25)<br><i>P</i> =0.32                                       |
| Me-PFOSA-AcOH               | 0.15 (-0.10, 0.40)<br><i>P</i> =0.25                           | -0.81 (-1.91, 0.28)<br><i>P</i> =0.14                        | 0.13 (-0.31, 0.56)<br><i>P</i> =0.57                                        |
| PFNA                        | 0.06 (-0.19, 0.32)<br><i>P</i> =0.64                           | 0.25 (-0.90, 1.40)<br><i>P</i> =0.67                         | -0.18 (-0.70, 0.33)<br><i>P</i> =0.49                                       |

Table S3 continued.

| PFAS Analyte                | Corrected Insulin Response                                    |                                                         |                                                               |
|-----------------------------|---------------------------------------------------------------|---------------------------------------------------------|---------------------------------------------------------------|
|                             | Model 1                                                       | Model 2                                                 | Model 3                                                       |
| <b>log<sub>2</sub>-PFAS</b> | <b><math>\beta(PFAS * time)</math><br/>Est. (95% CI)</b>      | <b><math>\beta(PFAS * Tx)</math><br/>Est. (95% CI)</b>  | <b><math>\beta(PFAS * time * Tx)</math><br/>Est. (95% CI)</b> |
| PFOS                        | -0.006 (-0.02, 0.004)<br><i>P</i> =0.28                       | 0.02 (-0.03, 0.06)<br><i>P</i> =0.43                    | 0.001 (-0.02, 0.02)<br><i>P</i> =0.91                         |
| PFOA                        | -0.011 (-0.02, 0.0004)<br><i>P</i> =0.06                      | -0.01 (-0.07, 0.04)<br><i>P</i> =0.62                   | -0.003 (-0.02, 0.02)<br><i>P</i> =0.78                        |
| PFHxS                       | -0.005 (-0.01, 0.003)<br><i>P</i> =0.20                       | -0.01 (-0.05, 0.02)<br><i>P</i> =0.44                   | 0.006 (-0.01, 0.02)<br><i>P</i> =0.48                         |
| Et-PFOSA-AcOH               | -0.004 (-0.01, 0.003)<br><i>P</i> =0.26                       | 0.002 (-0.03, 0.03)<br><i>P</i> =0.91                   | 0.002 (-0.01, 0.01)<br><i>P</i> =0.97                         |
| Me-PFOSA-AcOH               | -0.002 (-0.01, 0.005)<br><i>P</i> =0.60                       | 0.002 (-0.03, 0.03)<br><i>P</i> =0.91                   | 0.002 (-0.01, 0.02)<br><i>P</i> =0.85                         |
| PFNA                        | -0.003 (-0.01, 0.004)<br><i>P</i> =0.43                       | -0.02 (-0.02, 0.06)<br><i>P</i> =0.26                   | -0.001 (-0.02, 0.02)<br><i>P</i> =0.90                        |
|                             | Insulinogenic index                                           |                                                         |                                                               |
| PFOS                        | 0.003 (-0.07, 0.08)<br><i>P</i> =0.97                         | 0.02 (-0.13, 0.16)<br><i>P</i> =0.84                    | NA                                                            |
| PFOA                        | 0.02 (-0.06, 0.10)<br><i>P</i> =0.67                          | -0.02 (-0.18, 0.15)<br><i>P</i> =0.86                   | NA                                                            |
| PFHxS                       | 0.02 (-0.04, 0.07)<br><i>P</i> =0.51                          | -0.08 (-0.19, 0.04)<br><i>P</i> =0.18                   | NA                                                            |
| Et-PFOSA-AcOH               | -0.001 (-0.04, 0.05)<br><i>P</i> =0.97                        | -0.01 (-0.11, 0.08)<br><i>P</i> =0.79                   | NA                                                            |
| Me-PFOSA-AcOH               | 0.01 (-0.05, 0.06)<br><i>P</i> =0.84                          | 0.01 (-0.10, 0.12)<br><i>P</i> =0.91                    | NA                                                            |
| PFNA                        | 0.03 (-0.02, 0.09)<br><i>P</i> =0.27                          | 0.13 (-0.20, 0.03)<br><i>P</i> =0.13                    | NA                                                            |
|                             | Adiponectin: Baseline-Year1 (Linear model for the difference) |                                                         |                                                               |
|                             | <b><math>\beta(PFAS)</math><br/>Est. (95% CI)</b>             | <b><math>\beta(PFAS * Tx)</math>†<br/>Est. (95% CI)</b> |                                                               |
| PFOS                        | -0.07 (-0.17, 0.05)<br><i>P</i> =0.25                         | -0.10 (-0.32, 0.11)<br><i>P</i> =0.35                   | NA                                                            |
| PFOA                        | -0.08 (-0.17, 0.04)<br><i>P</i> =0.21                         | -0.06 (-0.31, 0.18)<br><i>P</i> =0.62                   | NA                                                            |
| PFHxS                       | -0.02 (-0.11, 0.07)<br><i>P</i> =0.60                         | -0.11 (-0.28, 0.06)<br><i>P</i> =0.20                   | NA                                                            |
| Et-PFOSA-AcOH               | -0.04 (-0.11, 0.03)<br><i>P</i> =0.31                         | -0.07 (-0.21, 0.07)<br><i>P</i> =0.33                   | NA                                                            |
| Me-PFOSA-AcOH               | -0.03 (-0.12, 0.05)<br><i>P</i> =0.43                         | <b>-0.17 (-0.21, 0.07)</b><br><i>P</i> =0.05            | NA                                                            |
| PFNA                        | -0.01 (-0.11, 0.08)<br><i>P</i> =0.75                         | -0.08 (-0.25, 0.09)<br><i>P</i> =0.33                   | NA                                                            |



NA= Interaction between time and treatment was not necessary in these models (marginal for IGRAT  $P>0.10$  and not applicable for the difference in adiponectin from baseline to year 1)

†= Reference treatment arm is the intensive lifestyle intervention

**Table S4.** <sup>a</sup>Adjusted Hazards Ratios (HRs) for time to first fasting hyperglycemia during study period relative to log<sub>2</sub>-PFAS plasma concentrations in the Diabetes Prevention Program trial

| PFAS Analyte                   | Crude HR (unadjusted)    |             | Adjusted HR              |             |
|--------------------------------|--------------------------|-------------|--------------------------|-------------|
|                                | ‡Fasting hyperglycemia   |             | ‡Fasting hyperglycemia   |             |
| PFAS (log <sub>2</sub> -scale) | HR (95% CI)              | <i>P</i>    | HR (95% CI)              | <i>P</i>    |
| <b>PFOS</b>                    | 0.90 (0.65, 1.25)        | 0.55        | 0.88 (0.63, 1.24)        | 0.47        |
| n-PFOS                         | 0.95 (0.70, 1.29)        | 0.73        | 0.92 (0.67, 1.28)        | 0.63        |
| Sm-PFOS                        | 0.86 (0.62, 1.17)        | 0.33        | 0.84 (0.60, 1.17)        | 0.31        |
| Sm2-PFOS                       | 0.91 (0.71, 1.18)        | 0.51        | 0.93 (0.72, 1.21)        | 0.60        |
| <b>PFOA</b>                    | 1.10 (0.76, 1.58)        | 0.62        | 1.12 (0.76, 1.64)        | 0.56        |
| n-PFOA                         | 1.02 (0.70, 1.49)        | 0.93        | 1.04 (0.70, 1.54)        | 0.86        |
| Sb-PFOA                        | <b>1.28 (1.03, 1.59)</b> | <b>0.03</b> | <b>1.29 (1.03, 1.63)</b> | <b>0.03</b> |
| <b>PFHxS</b>                   | 0.90 (0.70, 1.15)        | 0.41        | 0.96 (0.73, 1.26)        | 0.76        |
| <b>Et-PFOSA-AcOH</b>           | 0.97 (0.79, 1.19)        | 0.79        | 0.96 (0.76, 1.20)        | 0.70        |
| <b>Me-PFOSA-AcOH</b>           | 1.16 (0.90, 1.49)        | 0.25        | 1.12 (0.85, 1.48)        | 0.41        |
| <b>PFNA</b>                    | 1.04 (0.81, 1.34)        | 0.74        | 1.04 (0.79, 1.36)        | 0.80        |

<sup>a</sup>Adjusted for participant sex, race/ethnicity, BMI (continuous), age (categorical), marital status (categorical), education (categorical), smoking history (categorical) and treatment assignment (Placebo/lifestyle)

‡*n*=47 cases of first fasting hyperglycemia (elevated glucose but diabetes was not confirmed at a follow-up visit)

**Table S5.** <sup>a</sup>Adjusted Hazards Ratios (HRs) for the risk of developing diabetes during study period relative to log<sub>2</sub>-PFAS plasma concentrations stratified by treatment assignment

| PFAS Analyte                        | Placebo (n=476)   |          | Lifestyle intervention (n=481) |          | <sup>b</sup> Interaction test for treatment |
|-------------------------------------|-------------------|----------|--------------------------------|----------|---------------------------------------------|
|                                     | HR (95% CI)       | <i>P</i> | HR (95% CI)                    | <i>P</i> | <i>P</i>                                    |
| <b>PFAS (log<sub>2</sub>-scale)</b> |                   |          |                                |          |                                             |
| <b>PFOS</b>                         | 0.91 (0.76, 1.12) | 0.39     | 0.77 (0.57, 1.04)              | 0.09     | 0.65                                        |
| n-PFOS                              | 0.91 (0.76, 1.10) | 0.34     | 0.78 (0.59, 1.04)              | 0.09     | 0.76                                        |
| Sm-PFOS                             | 0.96 (0.79, 1.15) | 0.65     | 0.84 (0.63, 1.11)              | 0.22     | 0.62                                        |
| Sm2-PFOS                            | 1.03 (0.90, 1.19) | 0.68     | 0.92 (0.74, 1.14)              | 0.44     | 0.37                                        |
| <b>PFOA</b>                         | 1.04 (0.83, 1.30) | 0.73     | 1.06 (0.76, 1.46)              | 0.74     | 0.84                                        |
| n-PFOA                              | 1.01 (0.80, 1.27) | 0.96     | 1.03 (0.73, 1.44)              | 0.88     | 0.84                                        |
| Sb-PFOA                             | 1.10 (0.96, 1.24) | 0.18     | 1.11 (0.93, 1.32)              | 0.26     | 0.77                                        |
| <b>PFHxS</b>                        | 0.98 (0.83, 1.15) | 0.77     | 1.01 (0.81, 1.26)              | 0.91     | 0.99                                        |
| <b>Et-PFOSA-AcOH</b>                | 0.98 (0.86, 1.12) | 0.77     | 0.93 (0.78, 1.12)              | 0.45     | 0.94                                        |
| <b>Me-PFOSA-AcOH</b>                | 0.89 (0.77, 1.03) | 0.13     | 1.14 (0.91, 1.42)              | 0.25     | <b>0.04</b>                                 |
| <b>PFNA</b>                         | 1.00 (0.84, 1.17) | 0.97     | 0.92 (0.73, 1.15)              | 0.46     | 0.78                                        |

<sup>a</sup>Adjusted for participant sex, race/ethnicity, BMI (continuous), age (categorical), marital status (categorical), education (categorical) and smoking history (categorical)

<sup>b</sup>Statistical test for multiplicative interaction in non-stratified models (i.e. interaction between treatment assignment and PFAS compound)

**Table S6.** <sup>a</sup>Adjusted Hazards Ratios (HRs) for the risk of developing diabetes during study period relative to log<sub>2</sub>-PFAS plasma concentrations stratified by sex

| PFAS Analyte                        | Male (n=332)      |          | Female (n=625)    |          | <sup>b</sup> Interaction test for gender |
|-------------------------------------|-------------------|----------|-------------------|----------|------------------------------------------|
|                                     | HR (95% CI)       | <i>P</i> | HR (95% CI)       | <i>P</i> | <i>P</i>                                 |
| <b>PFAS (log<sub>2</sub>-scale)</b> |                   |          |                   |          |                                          |
| <b>PFOS</b>                         | 0.79 (0.61, 1.02) | 0.07     | 0.90 (0.73, 1.10) | 0.29     | 0.40                                     |
| n-PFOS                              | 0.80 (0.63, 1.02) | 0.08     | 0.89 (0.73, 1.08) | 0.24     | 0.50                                     |
| Sm-PFOS                             | 0.78 (0.61, 1.01) | 0.06     | 0.97 (0.80, 1.17) | 0.73     | 0.14                                     |
| Sm2-PFOS                            | 0.99 (0.82, 1.19) | 0.92     | 0.98 (0.84, 1.15) | 0.83     | 0.82                                     |
| <b>PFOA</b>                         | 0.89 (0.64, 1.22) | 0.46     | 1.11 (0.89, 1.39) | 0.35     | 0.31                                     |
| n-PFOA                              | 0.84 (0.60, 1.18) | 0.31     | 1.09 (0.86, 1.37) | 0.50     | 0.27                                     |
| Sb-PFOA                             | 1.05 (0.87, 1.27) | 0.59     | 1.12 (0.98, 1.27) | 0.08     | 0.63                                     |
| <b>PFHxS</b>                        | 0.89 (0.71, 1.13) | 0.34     | 1.01 (0.86, 1.19) | 0.86     | 0.40                                     |
| <b>Et-PFOSA-AcOH</b>                | 0.87 (0.74, 1.03) | 0.12     | 1.04 (0.91, 1.18) | 0.61     | 0.11                                     |
| <b>Me-PFOSA-AcOH</b>                | 0.88 (0.71, 1.09) | 0.25     | 0.98 (0.84, 1.13) | 0.80     | 0.35                                     |
| <b>PFNA</b>                         | 0.95 (0.75, 1.21) | 0.67     | 0.99 (0.84, 1.16) | 0.90     | 0.92                                     |

<sup>a</sup>Adjusted for participant race/ethnicity, BMI (continuous), age (categorical), marital status (categorical), education (categorical), smoking history (categorical) and treatment assignment.

<sup>b</sup>Statistical test for multiplicative interaction in non-stratified models (i.e. interaction between sex and PFAS compound) adjusted for covariates

**Table S7.** <sup>a</sup>Adjusted Hazards Ratios (HRs) for the risk of developing diabetes during study period: multiplicative interaction between baseline log<sub>2</sub>-PFAS plasma concentrations and BMI at baseline.

| <b>BMI x PFAS (log<sub>2</sub>-scale)</b> | <b>Hazard Ratio (HR)</b> |          |
|-------------------------------------------|--------------------------|----------|
|                                           | <b>HR (95% CI)</b>       | <b>P</b> |
| <b>PFOS</b>                               | 0.99 (0.97, 1.02)        | 0.66     |
| n-PFOS                                    | 0.99 (0.98, 1.01)        | 0.84     |
| Sm-PFOS                                   | 0.99 (0.97, 1.01)        | 0.37     |
| Sm2-PFOS                                  | 0.99 (0.98, 1.01)        | 0.90     |
| <b>PFOA</b>                               | 0.99 (0.97, 1.02)        | 0.57     |
| n-PFOA                                    | 0.99 (0.96, 1.02)        | 0.43     |
| Sb-PFOA                                   | 1.00 (0.99, 1.02)        | 0.66     |
| <b>PFHxS</b>                              | 1.00 (0.98, 1.01)        | 0.77     |
| <b>Et-PFOSA-AcOH</b>                      | 0.99 (0.97, 1.01)        | 0.51     |
| <b>Me-PFOSA-AcOH</b>                      | 1.00 (0.98, 1.01)        | 0.66     |
| <b>PFNA</b>                               | 0.99 (0.98, 1.01)        | 0.54     |

<sup>a</sup>Adjusted for participant sex, race/ethnicity, BMI (continuous), age (categorical), marital status (categorical), education (categorical), smoking history (categorical) and treatment assignment.

<sup>b</sup>Statistical test for multiplicative interaction in adjusted models (i.e. interaction between baseline BMI and PFAS plasma concentrations)

## Appendix A. Longitudinal Regression Model Equations

In **Model 1** we generate an effect estimate for each PFAS over the follow-up time. The model equation is

$$y_{ij} = \beta_0 + \beta_1 t_{ij} + \beta_2 t_{ij}^2 + \beta_3 \text{PFAS}_i + \beta_4 \text{Tx}_i + \beta_5 t_{ij} * \text{Tx}_i + \beta_6 \text{PFAS}_i * t_{ij} + \dots + b_{0i} + b_{1i} t_{ij} + e_{ij}$$

where  $i$  indexes the study participants and  $j$  the study visit number,  $y_{ij}$  is the glyceimic outcome for person  $i$  at visit number  $j$ ,  $t_{ij}$  is the time since randomization at visit  $ij$ ,  $\text{PFAS}_i$  is the baseline PFAS measurement for subject  $i$ , and  $\text{Tx}_i$  indicates treatment arm assignment (1 for lifestyle, 0 for placebo). The ellipsis indicates adjustment covariates. The model definition is completed by the assumption that  $e_{ij}$  is distributed normal and independent from  $(b_{0i}, b_{1i})$ , which is assumed multivariate normal.

In addition, if a significant quadratic interaction between time and the intervention was observed, then the following model was used instead:

$$y_{ij} = \beta_0 + \beta_1 t_{ij} + \beta_2 t_{ij}^2 + \beta_3 \text{PFAS}_i + \beta_4 \text{Tx}_i + \beta_5 t_{ij} * \text{Tx}_i + \beta_6 t_{ij}^2 * \text{Tx}_i + \beta_7 \text{PFAS}_i * t_{ij} + \dots + b_{0i} + b_{1i} t_{ij} + e_{ij}$$

where the notation and assumptions from equation 1 are unchanged.

In **Model 2**, we generate an effect estimate for each PFAS by treatment assignment, by introducing an interaction between the baseline PFAS and the treatment group indicator:

$$y_{ij} = \beta_0 + \beta_1 t_{ij} + \beta_2 t_{ij}^2 + \beta_3 \text{PFAS}_i + \beta_4 \text{Tx}_i + \beta_5 t_{ij} * \text{Tx}_i + \beta_6 t_{ij}^2 * \text{Tx}_i + \beta_7 \text{PFAS}_i * t_{ij} + \beta_8 \text{PFAS}_i * \text{Tx}_i + \dots + b_{0i} + b_{1i} t_{ij} + e_{ij}$$

where the notation and assumptions from equation 1 are unchanged.

In **Model 3**, we allow each PFAS to have a different effect over time in each treatment group, with a three-way interaction among PFAS, treatment group, and time:

$$y_{ij} = \beta_0 + \beta_1 t_{ij} + \beta_2 t_{ij}^2 + \beta_3 \text{PFAS}_i + \beta_4 \text{Tx}_i + \beta_5 t_{ij} * \text{Tx}_i + \beta_6 t_{ij}^2 * \text{Tx}_i + \beta_7 \text{PFAS}_i * t_{ij} + \beta_8 \text{PFAS}_i * \text{Tx}_i + \beta_9 \text{PFAS}_i * \text{Tx}_i * t_{ij} + \dots + b_{0i} + b_{1i} t_{ij} + e_{ij}$$
